# Supplementary material
Source: PubMed Central journal article supplement (PMC2999929)

## SUPPLEMENTARY MATERIAL

**Supplementary Table S1. Diffraction data collection and refinement statistics.** <sup>a</sup>Highest resolution shell is shown in parenthesis; <sup>b</sup>R<sub>free</sub> was calculated with a randomly selected test set consisting of 5% reflections.

**Supplementary Table S2. Plasma PCSK9 concentrations in different mouse strains.** Plasma PCSK9 levels were measured by the mouse total PCSK9 DELFIA assay. In most studies, samples were diluted 4 fold in the assay buffer before measurement.

**Supplementary Figure S1. Structural comparison of 1D05/PCSK9ΔC and EGF(A)/PCSK9ΔC complexes.** PCSK9 (magenta) bound to 1D05-Fab (yellow) as ribbon representation. B Ribbon representation of the PCSK9/EGF(A) complex in ribbon representation (dark gray). C Superposition of the PCSK9/1D05-Fab complex on the PCSK9/EGF(A) complex. The PCSK9 molecules were used for the superposition.

**Supplementary Figure S2. CETP/LDLr-hemi mice with a human-like lipoprotein profile.** Plasma samples were collected from both adult male and female mice. LDLc, HDLc, total cholesterol and TG were measured as described in the Experimental Procedures. Results are mean ± SEM, n=14.

**Supplementary Figure S3. Duration of the effect of 1D05-IgG2 on LDLc, total cholesterol and HDLc in CETP/LDLr-hemi mice.** Mice were injected with a single dose of 1D05-IgG2 (3 mpk, i.v.). % of inhibition relative to PBS (vehicle control) in plasma LDLc (A), total cholesterol (B) and HDLc (C) were measured at post-treatment time as indicated. Results are mean ± SEM, n=8.

**Supplementary Table S1: Diffraction data collection and refinement statistics**

| Data collection                                    |                                               | Refinement                                        |             |
|----------------------------------------------------|-----------------------------------------------|---------------------------------------------------|-------------|
| Space group                                        | P2 <sub>1</sub> 2 <sub>1</sub> 2 <sub>1</sub> | No. reflections                                   | 30,522      |
| Cell dimension: <i>a</i> , <i>b</i> , <i>c</i> (Å) | 66.59, 67.83, 250.86                          | R <sub>work</sub> /R <sub>free</sub> <sup>b</sup> | 0.202/0.259 |
| Cell dimensions $\alpha$ , $\beta$ , $\gamma$ (°)  | 90.00, 90.00, 90.00                           | No. atoms                                         | 6,096       |
| Resolution (Å)                                     | 40-2.70 (2.85-2.70) <sup>a</sup>              | Mean <i>B</i> -value (Å <sup>2</sup> )            | 34.08       |
| R <sub>sym</sub>                                   | 0.13 (0.51)                                   | R.m.s deviations                                  |             |
| <I / $\sigma$ I>                                   | 10.5 (2.6)                                    | Bond lengths (Å)                                  | 0.010       |
| No. observations                                   | 163,731 (21,781)                              | Bond angles (°)                                   | 1.413       |
| No. unique                                         | 32,238 (4,605)                                |                                                   |             |
| Completeness (%)                                   | 100 (99.9)                                    |                                                   |             |
| Redundancy                                         | 5.1 (4.7)                                     |                                                   |             |

**Supplementary Table S2. Plasma PCSK9 concentrations in different mouse strains**

| Strain         | Ave,<br>nM | SD,<br>nM | N  | CV%   |
|----------------|------------|-----------|----|-------|
| C57BL/6J       | 3.1        | 1.5       | 31 | 48.2  |
| ApoE -/-       | 4.1        | 4.4       | 6  | 108.2 |
| CETPtg/LDLR+/- | 15.7       | 4.6       | 9  | 29.0  |

Supplementary Figure S1. Structural comparison of 1D05/PCSK9 $\Delta$ C and EGF(A)/PCSK9 $\Delta$ C complexes

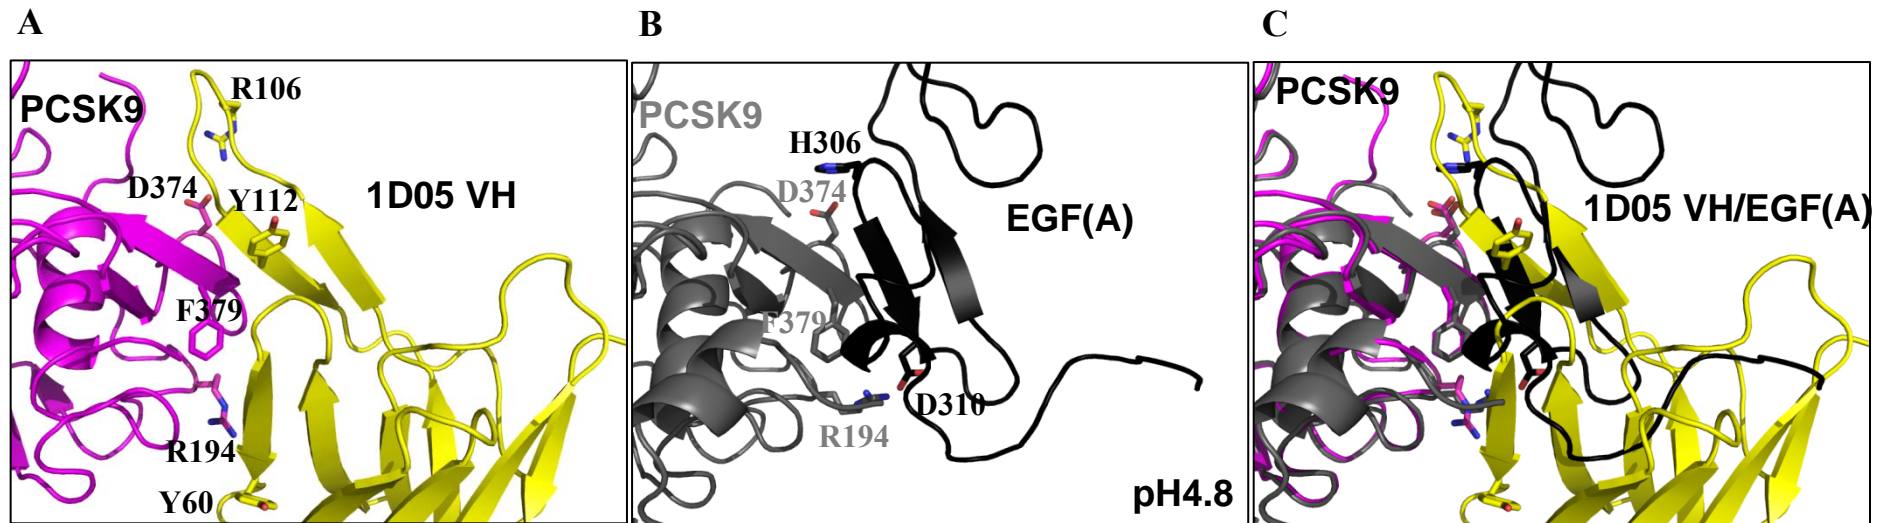

**Supplementary Figure S2. CETP/LDLr-hemi mice with a human-like lipoprotein profile**

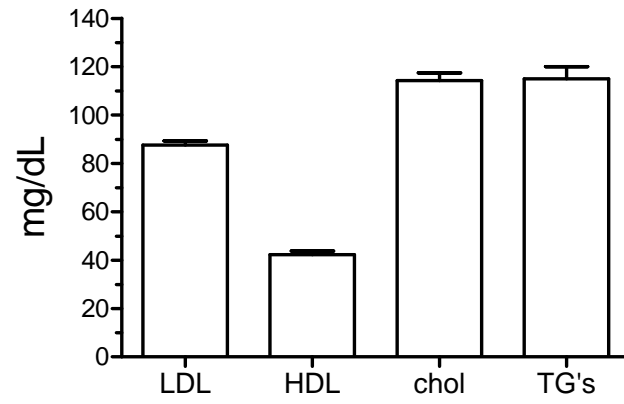

**Supplementary Figure S3. Duration of the effect of 1D05-IgG2 on LDLc, total cholesterol and HDLc in CETP/LDLr-hemi mice**

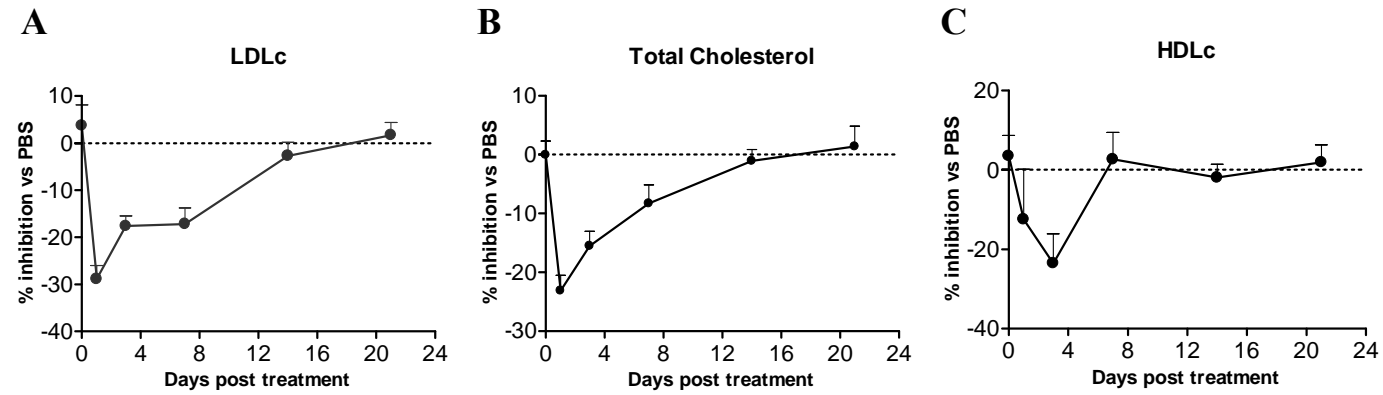

Supplement: supp_M011445_jlr.M011445-1.pdf [file supp_M011445_jlr.M011445-1.pdf]
